# Supplementary material for: Integration of high-throughput omics technologies in medicinal plant research: The new era of natural drug discovery
Source: Front Plant Sci. 2023 Jan 18;14:1073848. doi: 10.3389/fpls.2023.1073848 (PMC9891177; doi:10.3389/fpls.2023.1073848)
Supplement: Supplementary file 1 [file Table_1.xlsx]

## Sheet: Sheet1
Supplementary table 1. Statistics of published journals on medicinal plant genomes.
Number	Publication date	Scientific name	Scientific classification	Publication Journal	Assembly genome size	Chromosome number	Chromosome-level assembly	Transcriptomics	Metabolomics	Active substances of focus	Country	Link
1	2019.11	Abrus precatorius	Plantae Angiosperms Eudicots Rosids Fabales Fabaceae Faboideae Abrus A. precatorius	Multidisciplinary Digital Publishing Institute(MDPI)	347 Mb	2n=22	160 scaffolds	✔	×		USA	https://www.mdpi.com/2072-6651/11/12/691/htm
2	2022.06	Abrus cantoniensis	Plantae Angiosperms Eudicots Rosids Fabales Fabaceae Faboideae Abrus A. cantoniensis	The Plant Genome	381.27 Mb	2n=22	✔	✔	×		China	https://acsess.onlinelibrary.wiley.com/doi/full/10.1002/tpg2.20236
3	2020.08	Acer truncatum	Plantae Tracheophytes Angiosperms Eudicots Rosids Sapindales Sapindaceae Acer A. truncatum	The Plant Journal	633.28 Mb	2n=2x=26	✔	✔	✔	Fatty acid	China	https://onlinelibrary.wiley.com/doi/10.1111/tpj.14954
4	2021.02	Akebia trifoliata	Plantae Angiosperms Eudicots Ranunculales Lardizabalaceae Akebia A. trifoliata	Horticulture Research	682.14 Mb	2n=32	✔	✔	✔	Terpenoid and fatty acid	China	https://www.nature.com/articles/s41438-020-00458-y
5	2020	Allium sativum	Plantae Angiosperms Monocots Liliales Amaryllidaceae Allium A. sativum	Molecular Plant	16.24Gb	2n=16	✔	✔	✔	Allicin	China	https://www.sciencedirect.com/science/article/pii/S167420522030232X
6	2021.01	Aloe vera	Plantae Tracheophyta Angiosperms Monocots Asparagales Asphodelaceae Aloe A. vera	iScience	12.93 Gb	2n=14	7,545,697 scaffolds	✔	×		India	https://www.sciencedirect.com/science/article/pii/S258900422100047X
7	2022.06.01	Amomum tsao-ko (Lanxangia tsaoko)	Plantae Tracheophytes Angiosperms Monocots Commelinids Zingiberales Zingiberaceae Lanxangia L. tsaoko	Frontiers in Plant Science	2.70 Gb	2n=48	×	×	×		China	https://www.frontiersin.org/articles/10.3389/fpls.2022.904178/full
8	2015.11	Ananas comosus	Plantae Angiosperms Monocots Commelinids Poales Bromeliaceae Ananas A. comosus	Nature genetics	382 Mb	2n=50	3,133 scaffolds	✔	×		USA	https://link.springer.com/article/10.1007/s12042-019-09232-4?utm_source=xmol&utm_medium=affiliate&utm_content=meta&utm_campaign=DDCN_1_GL01_metadata
9	2018.11	Andrographis paniculata	Plantae Angiosperms Eudicots Asterids Lamiales Acanthaceae Andrographis A. paniculata	The Plant Journal	269 Mb	2n=24	1,278 contigs	×	✔	Diterpenoid (neoandrographolide)	China	https://onlinelibrary.wiley.com/doi/full/10.1111/tpj.14162
9	2020.06	Andrographis paniculata	Plantae Angiosperms Eudicots Asterids Lamiales Acanthaceae Andrographis A. paniculata	Frontiers in Genetics	284 Mb	2n=24	✔	✔	×		China	https://www.frontiersin.org/articles/10.3389/fgene.2020.00701/full
10	2019.02	Antirrhinum majus	Plantae Tracheophyta Angiosperms Eudicots Asterids Lamiales Plantaginaceae Antirrhinum A. majus	Nature Plants	510 Mb	2n=2x=16	✔	×	×		China	https://www.nature.com/articles/s41477-018-0349-9
11	2020	Apium graveolens	Plantae Tracheophyta Angiosperms Eudicots Asterids Apiales Apiaceae Apium A. graveolens	Horticulture Research	2.21Gb	2n=22	257,842 scaffolds	✔	×		China	https://www.nature.com/articles/s41438-019-0235-2?utm_source=xmol&utm_medium=affiliate&utm_content=meta&utm_campaign=DDCN_1_GL01_metadata
11	2020.01	Apium graveolens	Plantae Tracheophyta Angiosperms Eudicots Asterids Apiales Apiaceae Apium A. graveolens	Horticulture Research	2.21 Gb	2n=22	257,842 scaffolds	✔	×		China	https://www.nature.com/articles/s41438-019-0235-2
12	2020.03	Aquilaria sinensis	Plantae Angiosperms Eudicots Rosids Malvales Thymelaeaceae Aquilaria A. sinensis	Giga science	726.5 Mb	2n=16	✔	×	×		China	https://academic.oup.com/gigascience/article/9/3/giaa013/5771296?login=false
12	2020.03	Aquilaria sinensis	Plantae Angiosperms Eudicots Rosids Malvales Thymelaeaceae Aquilaria A. sinensis	Molecular Ecology Resources	783.8 Mb	2n=16	✔	✔	×		China	https://onlinelibrary.wiley.com/doi/full/10.1111/1755-0998.13154
13	2020.07	Aquilegia oxysepala	Plantae Tracheophyta Angiosperms Eudicots Ranunculales Ranunculaceae Aquilegia A. oxysepala	Horticulture Research	277.4 Mb	2n=14	✔	×	×		China	https://academic.oup.com/hr/article/doi/10.1038/s41438-020-0328-y/6445596
14	2021.11	Arctium lappa	Plantae Tracheophytes Angiosperms Eudicots Asterids Asterales Asteraceae Arctium A. lappa	Molecular Ecology Resources	1.79 Gb	2n=36	✔	✔	×		China	https://onlinelibrary.wiley.com/doi/abs/10.1111/1755-0998.13547
15	2021.06	Areca catechu	Plantae Angiosperms Monocots Commelinids Arecales Arecaceae Areca A. catechu	Molecular Ecology Resources	2.51 Gb	2n=32	✔	✔	×		China	https://onlinelibrary.wiley.com/doi/abs/10.1111/1755-0998.13446
16	2022.06.11	Artemisia argyi	Plantae Tracheophytes Angiosperms Eudicots Asterids Asterales Asteraceae Artemisia A. argyi	Plant Biotechnology Journal	8.03 Gb	2n=34	✔	✔	×		China	https://onlinelibrary.wiley.com/doi/10.1111/pbi.13870
17	2018.04	Artemisia annua	Plantae Angiosperms Eudicots Asterids Asterales Asteraceae Artemisia A. annua	Molecular Plant	1.74 Gb	2n=18	39,579 scaffolds	✔	✔	Artemisinin	China	https://www.cell.com/molecular-plant/fulltext/S1674-2052(18)30123-0?_returnURL=https%3A%2F%2Flinkinghub.elsevier.com%2Fretrieve%2Fpii%2FS1674205218301230%3Fshowall%3Dtrue
17	2022.06.01	Artemisia annua	Plantae Angiosperms Eudicots Asterids Asterales Asteraceae Artemisia A. annua	Molecular Plant	1.5 Gb	2n=18	✔	✔	×		China	https://pubmed.ncbi.nlm.nih.gov/35655434/
18	2017.11	Asparagus officinalis	Plantae Tracheophyta Angiosperms Monocots Asparagales Asparagaceae Asparagus A. officinalis	Nature Communications	1,162 Mb	2n=20	✔	✔	×		China	https://www.nature.com/articles/s41467-017-01064-8
19	2020	Asparagus setaceus	Plantae Tracheophyta Angiosperms Monocots Asparagales Asparagaceae Asparagus A. setaceus	Horticulture Research	710.15Mb	2n=20	✔	×	×		China	https://www.nature.com/articles/s41438-020-0271-y?utm_source=xmol&utm_medium=affiliate&utm_content=meta&utm_campaign=DDCN_1_GL01_metadata
20	2020	Averrhoa carambola	Plantae Tracheophyta Angiosperms Eudicots Rosids Oxalidales Oxalidaceae Averrhoa A. carambola	Horticulture Research	357.79Mb	2n=22	✔	✔	×		China	https://www.nature.com/articles/s41438-020-0307-3?utm_source=xmol&utm_medium=affiliate&utm_content=meta&utm_campaign=DDCN_1_GL01_metadata
20	2020.06	Averrhoa carambola	Plantae Tracheophyta Angiosperms Eudicots Rosids Oxalidales Oxalidaceae Averrhoa A. carambola	Horticulture Research	305.13 Mb	2n=2x=22	✔	✔	×		China	https://www.nature.com/articles/s41438-020-0307-3
21	2012	Azadirachta indica	Plantae Tracheophyta Angiosperms Eudicots Rosids Sapindales Meliaceae Azadiracht A. indica	BMC Genomics	364Mb	2n=28	9,714 scaffolds	✔	✔	Terpenoid	India	https://bmcgenomics.biomedcentral.com/articles/10.1186/1471-2164-13-464
21	2021.11	Azadirachta indica	Plantae Tracheophyta Angiosperms Eudicots Rosids Sapindales Meliaceae Azadiracht A. indica	bioRxiv	281 Mb	2n=28	✔	✔	×		China	https://www.biorxiv.org/content/10.1101/2021.11.11.468207v1.full
21	2022	Azadirachta indica	Plantae Tracheophyta Angiosperms Eudicots Rosids Sapindales Meliaceae Azadiracht A. indica	Frontiers in Plant Science	281Mb	2n=28	✔	✔	✔	Terpene	China	https://www.frontiersin.org/articles/10.3389/fpls.2022.853861/full
22	2021.02	Betula platyphylla	Plantae Tracheophyta Angiosperms Eudicots Rosids Fagales Betulaceae Betula B. platyphylla	Horticulture Research	430 Mb	2n=2x=28	✔	✔	×		China	https://www.nature.com/articles/s41438-021-00481-7
23	2022.07	Bletilla striata	Plantae Tracheophytes Angiosperms Monocots Asparagales Orchidaceae Epidendroideae Arethuseae Bletilla B. striata	The Plant Journal	Haplotype-A:2.37 Gb Haplotype-B:2.43 Gb	2n=32	✔	✔	×		China	https://onlinelibrary.wiley.com/doi/abs/10.1111/tpj.15892
24	2017.11	Boehmeria nivea	Plantae Angiosperms Eudicots Rosids Rosales Urticaceae Boehmeria B. nivea	DNA Research	335.6 Mb	2n=28	293,578 scaffolds	×	×		China	https://academic.oup.com/dnaresearch/article/25/2/173/4633668?login=false
24	2018.02	Boehmeria nivea	Plantae Angiosperms Eudicots Rosids Rosales Urticaceae Boehmeria B. nivea	Molecular Ecology Resources	341.9 Mb	2n=28	10,339 scaffolds	×	×		China	https://onlinelibrary.wiley.com/doi/10.1111/1755-0998.12766
25	2018.05	Bombax ceiba	Plantae Tracheophytes Angiosperms Eudicots Rosids Malvales Malvaceae Bombax B. ceiba	Giga science	895 Mb	2n=72	2,759 scaffolds	×	×		China	https://academic.oup.com/gigascience/article/7/5/giy051/4994837?login=true
26	2014	Brassica oleracea	Plantae Angiospermae Magnoliopsida Capparales Brassicaceae Brassica B.oleracea	Nature Communications	630Mb	2n=18	✔	✔	✔	Aliphatic and indolic glucosinolates	China	https://www.nature.com/articles/ncomms4930?utm_source=xmol&utm_medium=affiliate&utm_content=meta&utm_campaign=DDCN_1_GL01_metadata
26	2019	Brassica oleracea	Plantae Angiospermae Magnoliopsida Capparales Brassicaceae Brassica B.oleracea	Horticulture Research	584.60Mb	2n=18	1,484 contigs	✔	×		China	https://www.nature.com/articles/s41438-019-0164-0?utm_source=xmol&utm_medium=affiliate&utm_content=meta&utm_campaign=DDCN_1_GL01_metadata
26	2021	Brassica oleracea	Plantae Angiospermae Magnoliopsida Capparales Brassicaceae Brassica B.oleracea	BMC Biology	566.9Mb	2n=18	✔	×	×		China	https://bmcbiol.biomedcentral.com/articles/10.1186/s12915-021-01031-2?utm_source=xmol&utm_medium=affiliate&utm_content=meta&utm_campaign=DDCN_1_GL01_metadata
27	2019.02	Broussonetia papyrifera	Plantae Tracheophyta Angiosperms Eudicots Rosids Rosales Moraceae Broussonetia B. papyrifera	Molecular Plant	383.93 Mb	2n=2x=26	✔	✔	×		China	https://www.cell.com/molecular-plant/fulltext/S1674-2052(19)30052-8?_returnURL=https%3A%2F%2Flinkinghub.elsevier.com%2Fretrieve%2Fpii%2FS1674205219300528%3Fshowall%3Dtrue#%20
28	2022.03	Bupleuri radix	Plantae Angiosperms Dicotyledoneae Apiales Umbelliferae Bupleurum L. B. radix	Frontiers in Genetics	haplotype 0: 621.27 Mb haplotype 1: 600.48 Mb	2n=12	✔	✔	×		China	https://www.frontiersin.org/articles/10.3389/fgene.2022.878431/full
29	2011.11	Cajanus cajan	Plantae Angiosperms Eudicots Rosids Fabales Fabaceae Faboideae Cajanus C. cajan	Nature Biotechnology	833.07 Mb	2n=2x=22	✔	×	×		USA	https://www.nature.com/articles/nbt.2022		China-taiwan
30	2018.08	Calamus simplicifolius Daemonorops jenkinsiana	Plantae Angiosperms Monocots Commelinids Arecales Arecaceae Calamus C. simplicifolius	Giga science	1.94 Gb 1.61 Gb	2n=24 2n=26	✔	×	×		China	https://academic.oup.com/gigascience/article/7/9/giy097/5067873?login=true
31		Daemonorops jenkinsiana
32	2018.02	Calotropis gigantea	Plantae Angiosperms Eudicots Asterids Gentianales Apocynaceae Calotropis C. gigantea	G3: Genes, Genomes, Genetics	157 Mb	2n=22	1,536 scaffolds	✔	×		Michigan	https://academic.oup.com/g3journal/article/8/2/385/6028123
33	2017	Camellia sinensis	Plantae Angiosperms Dicotyledoneae Theales Theaceae Camellia C.sinensis	Molecular Plant	3.02 Gb	2n=2x=30	37,618 scaffolds	✔	×		China	https://www.sciencedirect.com/science/article/pii/S167420521730103X#fig1
33	2018	Camellia sinensis	Plantae Angiosperms Dicotyledoneae Theales Theaceae Camellia C.sinensis	PNAS	3.1 Gb	2n=2x=30	14,051 scaffolds	✔	✔	Catechins, Theanine and Caffeine	China	https://www.pnas.org/doi/10.1073/pnas.1719622115
33	2021	Camellia sinensis	Plantae Angiosperms Dicotyledoneae Theales Theaceae Camellia C.sinensis	Nature genetics	3.15Gb	2n=2x=30	✔	✔	×		China	https://www.nature.com/articles/s41588-021-00895-y?utm_source=xmol&utm_medium=affiliate&utm_content=meta&utm_campaign=DDCN_1_GL01_metadata
34	2017.07	Camptotheca acuminata	Plantae Angiosperms Eudicots Asterids Cornales Nyssaceae Camptotheca C. acuminata	Giga science	516 Mb	2n=44	1,394 scaffolds	×	×		USA	https://academic.oup.com/gigascience/article/6/9/gix065/4004835
35	2011.10	Cannabis sativa	Plantae Angiosperms Eudicots Rosids Rosales Cannabaceae Cannabis C. sativa	Genome Biology	534 Mb	2n=20	×	✔	×		Canada	https://genomebiology.biomedcentral.com/articles/10.1186/gb-2011-12-10-r102
35	2020.05	Cannabis sativa	Plantae Angiosperms Eudicots Rosids Rosales Cannabaceae Cannabis C. sativa	Horticulture Research	808 Mb	2n=20	✔	×	×		China	https://www.nature.com/articles/s41438-020-0295-3?utm_source=xmol&utm_medium=affiliate&utm_content=meta&utm_campaign=DDCN_1_GL01_metadata
35	2020.12	Cannabis sativa	Plantae Angiosperms Eudicots Rosids Rosales Cannabaceae Cannabis C. sativa	bioRxiv	female:818 Mb male:843 Mb	2n=20	✔	×	×		Australia	https://www.biorxiv.org/content/10.1101/2020.12.13.422592v1.full
36	2014	Capsicum annuum	Plantae Tracheophyta Angiosperms Eudicots Asterids Solanales Solanaceae Capsicum C. annuum	PNAS	3.48Gb	2n=2x=24	967,017scaffolds	✔	✔	Capsaicin	China	https://www.pnas.org/doi/full/10.1073/pnas.1400975111
36	2014.02	Capsicum annuum	Plantae Tracheophyta Angiosperms Eudicots Asterids Solanales Solanaceae Capsicum C. annuum	Nature genetics	2.63 Gb	2n=24	✔	✔	×		Korea	https://www.nature.com/articles/ng.2877
36	2018	Capsicum annuum	Plantae Tracheophyta Angiosperms Eudicots Asterids Solanales Solanaceae Capsicum C. annuum	Horticulture Research	3.5Gb	2n=24	✔	×	×		USA	https://www.nature.com/articles/s41438-017-0011-0?utm_source=xmol&utm_medium=affiliate&utm_content=meta&utm_campaign=DDCN_1_GL01_metadata
36	2018.01	Capsicum annuum	Plantae Tracheophyta Angiosperms Eudicots Asterids Solanales Solanaceae Capsicum C. annuum	Horticulture Research	3.21 Gb	2n=24	✔	×	×		USA	https://academic.oup.com/hr/article/doi/10.1038/s41438-017-0011-0/6486755
37	2021	Carthamus tinctorius	Plantae Angiosperms Dicotyledoneae Campanulales Asteraceae Carthamus L. C.tinctorius	Plant Biotechnology Journal	1.07Gb	2n=2x=24	✔	✔	✔	Fatty acid and flavonoid	China	https://onlinelibrary.wiley.com/doi/full/10.1111/pbi.13586
38	2018.11	Casuarina equisetifolia	Plantae Angiosperms Eudicots Rosids Fagales Casuarinaceae Casuarina C. equisetifolia	The Plant Journal	301 Mb	2n=18	366 super-scaffolds	✔	×		China	https://onlinelibrary.wiley.com/doi/full/10.1111/tpj.14159
39	2012.03	Catharanthus roseus	Plantae Angiosperms Eudicots Asterids Gentianales Apocynaceae Catharanthus C. roseus	Aob Plants	738 Mb	2n=2x=16	×	×	×		Portugal	https://academic.oup.com/aobpla/article/doi/10.1093/aobpla/pls002/174496
39	2015	Catharanthus roseus	Plantae Angiosperms Eudicots Asterids Gentianales Apocynaceae Catharanthus C. roseus	The Plant Journal	523Mb	2n=2x=16	×	✔	✔	Monoterpene indole alkaloid	UK	https://onlinelibrary.wiley.com/doi/full/10.1111/tpj.12827
40	2021	Centella asiatica	Plantae Angiospermae Magnoliopsida Apiales Apiaceae Centella C.asiatica	Genomics	430Mb	2n=2x=18	11,169 scaffolds	✔	×		Thailand	https://www.sciencedirect.com/science/article/pii/S0888754321001920
41	2020	Cerasus humilis	Plantae Angiospermae Magnoliopsida Rosales Rosaceae Prunus C.humilis	Frontiers In Genetics	228.20Mb	2n=2x=16	✔	×	×		China	https://www.frontiersin.org/articles/10.3389/fgene.2020.00956/full
42	2020.08	Chimonanthus praecox	Plantae Tracheophyta Angiosperms Magnoliids Laurales Calycanthaceae Chimonanthus C. praecox	Genome Biology	767.4 Mb	2n=22	✔	✔	×		China	https://genomebiology.biomedcentral.com/articles/10.1186/s13059-020-02088-y
43	2020.06	Chimonanthus salicifolius	Plantae Tracheophytes Angiosperms Magnoliids Laurales Calycanthaceae Chimonanthus C. salicifolius	The Plant Journal	820.1 Mb	2n=2x=22	✔	✔	✔	Flavonoid	China	https://onlinelibrary.wiley.com/doi/10.1111/tpj.14874
44	2020.06	Chiococca alba	Plantae Tracheophytes Angiosperms Eudicots Asterids Gentianales Rubiaceae Chiococca C. alba	DNA Research	558 Mb	2n=24	3,518 scaffolds	✔	×		USA	https://academic.oup.com/dnaresearch/article/27/3/dsaa013/5869045?login=false
45	2018.12	Chrysanthemum nankingense	Plantae Angiosperms Eudicots Asterids Asterales Asteraceae Chrysanthemum C. indicum	Molecular Plant	2.53Gb	2n=18	24,051 contigs	✔	×		China	https://www.sciencedirect.com/science/article/pii/S1674205218303083
46	2019.01	Cinnamomum kanehirae	Plantae Tracheophyta Angiosperms Magnoliids Laurales Lauraceae Cinnamomum C. kanehirae	Nature Plants	730.7 Mb	2n=24	✔	×	×		China	https://www.nature.com/articles/s41477-018-0337-0
47	2017.04	Citrus medica Citrus ichangensis Atalantia buxifolia	Plantae Tracheophyta Angiosperms Eudicots Rosids Sapindales Rutaceae	Nature genetics	368 Mb 334 Mb 288 Mb	2n=2x=18 2n=2x=18 2n=2x=18	✔	✔	×		China	https://www.nature.com/articles/ng.3839
48		Citrus ichangensis
49		Atalantia buxifolia
50	2018	Citrus reticulata	Plantae Angiospermae Magnoliopsida Sapindales Rutaceae Citrus C.reticulata	Molecular Plant	325Mb	2n=18	42,714 scaffolds	✔	✔		China	https://www.sciencedirect.com/science/article/pii/S1674205218301874
51	2020.03	Coffea arabica	Plantae Angiosperms Eudicots Asterids Gentianales Rubiaceae Coffea C. arabica	Scientific Reports	1.536 Gb	2n=4x=44	×	×	×		France	https://www.nature.com/articles/s41598-020-61216-7
52	2014.09	Coffea canephora	Plantae Angiosperms Eudicots Asterids Gentianales Rubiaceae Coffea C. canephora	Science	568.6 Mb	2n=2x=22	13,345 scaffolds	✔	×		France	https://www.science.org/doi/10.1126/science.1255274?url_ver=Z39.88-2003&rfr_id=ori:rid:crossref.org&rfr_dat=cr_pub%20%200pubmed
53	2020	Coix aquatica	Plantae Angiosperms Monocots Commelinids Poales Poaceae Coix	Molecular Plant	1.62 Gb	2n=20	✔	✔	×		China	https://www.sciencedirect.com/science/article/pii/S1674205219303727
54	2020	Coix lacryma-jobi	Plantae Angiosperms Monocots Commelinids Poales Poaceae Coix C. lacryma-jobi	Molecular Plant	1.73Gb	2n=20	✔	✔	×		China	https://www.sciencedirect.com/science/article/pii/S1674205219303739
54	2020.05	Coix lacryma-jobi	Plantae Angiosperms Monocots Commelinids Poales Poaceae Coix C. lacryma-jobi	Frontiers in Plant Science	1.28 Gb	2n=20	3,362 scaffold	✔	✔		Korea	https://www.frontiersin.org/articles/10.3389/fpls.2020.00630/full
55	2020.08	Colocasia esculenta	Plantae Tracheophyta Angiosperms Monocots Alismatales Araceae Colocasia C. esculenta	Molecular Ecology Resources	2,311 Mb	2n=28	✔	×	×		China	https://onlinelibrary.wiley.com/doi/abs/10.1111/1755-0998.13239
56	2021.06	Coptis chinensis	Plantae Angiosperms Eudicots Ranunculales Ranunculaceae Coptis C. chinensis	Nature Communications	916.5 Mb	2n=18	✔	✔	✔		China	https://www.nature.com/articles/s41467-021-23611-0?utm_source=xmol&utm_medium=affiliate&utm_content=meta&utm_campaign=DDCN_1_GL01_metadata
56	2021	Coptis chinensis	Plantae Angiosperms Eudicots Ranunculales Ranunculaceae Coptis C. chinensis	Horticulture Research	958.20Mb	2n=2x=18	✔	✔	✔		China	https://www.nature.com/articles/s41438-021-00559-2?utm_source=xmol&utm_medium=affiliate&utm_content=meta&utm_campaign=DDCN_1_GL01_metadata
57	2017.01	Corchorus olitorius Corchorus capsularis	Plantae Tracheophyta Angiosperms Eudicots Rosids Malvales Malvaceae Grewioideae Sparrmannieae Corchorus	Nature Plants	448 Mb 338 Mb	2n=14	22,944 scaffolds 6,125 scaffolds	✔	×		USA	https://www.nature.com/articles/nplants2016223
58		Corchorus capsularis
59	2019.12	Coriandrum sativum	Plantae Tracheophyta Angiosperms Eudicots Asterids Apiales Apiaceae Coriandrum C. sativum	Plant Biotechnology Journal	2118.68 Mb	2n=2x=22	✔	✔	✔		China	https://onlinelibrary.wiley.com/doi/10.1111/pbi.13310
60	2022	Corydalis tomentella	Plantae Angiospermae Magnoliopsida Ranunculales Papaveraceae Corydalis C.tomentella	The Plant Journal	248.9 Mb	2n=16	✔	×	✔		China	https://onlinelibrary.wiley.com/doi/abs/10.1111/tpj.15788
61	2022.06	Curcuma alismatifolia	Plantae Tracheophytes Angiosperms Monocots Commelinids Zingiberales Zingiberaceae Curcuma C. alismatifolia	Frontiers in Plant Science	991.3 Mb	2n=32	✔	✔	×		China	https://www.frontiersin.org/articles/10.3389/fpls.2022.899588/full
62	2018.07	Cuscuta australis	Plantae Angiosperms Eudicots Asterids Solanales Convolvulaceae Cuscuta C. australis	Nature Communications	264.83 Mb	2n=28	103 scaffolds	✔	×		China	https://www.nature.com/articles/s41467-018-04721-8
63	2021.08	Cymbidium sinense	Plantae Angiosperms Monocots Asparagales Orchidaceae Cymbidieae Cyrtopodiinae Cymbidium C. sinense	Plant Biotechnology Journal	3.52 Gb	2n=40	✔	✔	✔		China	https://onlinelibrary.wiley.com/doi/full/10.1111/pbi.13676
64	2020.08	Dalbergia odorifera	Plantae Angiosperms Eudicots Rosids Fabales Fabaceae Faboideae Dalbergia D. odorifera	Giga science	653.45 Mb	2n=20	✔	×	×		China	https://academic.oup.com/gigascience/article/9/8/giaa084/5893771
65	2021.03	Datura stramonium	Plantae Tracheophyta Angiosperms Eudicots Asterids Solanales Solanaceae Datura D. stramonium	BMC Genomics	2.1 Gb	2n=24	232,605 scaffolds	×	×		USA	https://bmcgenomics.biomedcentral.com/articles/10.1186/s12864-021-07489-2
66	2016	Daucus carota	Plantae Angiospermae Magnoliopsida Apiales Apiaceae Daucus D.carota	Nature Genetics	421.5Mb	2n=2x=18	4,907 scaffolds	✔	✔		USA	https://www.nature.com/articles/ng.3565?utm_source=xmol&utm_medium=affiliate&utm_content=meta&utm_campaign=DDCN_1_GL01_metadata
67	2016.01	Dendrobium catenatum	Plantae Angiosperms Monocots Asparagales Orchidaceae Dendrobium D. catenatum	Scientific Reports	1.01 Gb	2n=2x=38	×	×	×		China	https://www.nature.com/articles/srep19029
68	2022.03	Dendrobium nobile	Plantae Angiosperms Monocots Asparagales Orchidaceae Dendrobium D. nobile	Frontiers in Genetics	1.19 Gb	2n=38	✔	✔	×		China	https://www.frontiersin.org/articles/10.3389/fgene.2022.844622/full
69	2015.01	Dendrobium officinale	Plantae Angiosperms Monocots Asparagales Orchidaceae Dendrobium D. nobile	Molecular Plant	1.35 Gb	2n=38	×	×	×		China	https://www.cell.com/molecular-plant/fulltext/S1674-2052(14)00047-1?_returnURL=https%3A%2F%2Flinkinghub.elsevier.com%2Fretrieve%2Fpii%2FS1674205214000471%3Fshowall%3Dtrue
69	2021.02	Dendrobium officinale	Plantae Angiosperms Monocots Asparagales Orchidaceae Dendrobium D. nobile	Acta Pharmaceutica Sinica B	1.23 Gb	2n=38	✔	×	×		China	https://www.sciencedirect.com/science/article/pii/S2211383521000332
70	2017.03	Dimocarpus longan	Plantae Tracheophyta Angiosperms Eudicots Rosids Sapindales Sapindaceae Dimocarpus D. longan	Giga science	471.88 Mb	2n=30	17,367 scaffolds	✔	×		China	https://academic.oup.com/gigascience/article/6/5/gix023/3091720
71	2020.05	Dionaea muscipula	Plantae Tracheophyta Angiosperms Eudicots Caryophyllales Droseraceae Dionaea D. muscipula	Current Biology	1,500 Mb	2n=32	×	✔	×		Germany	https://www.cell.com/current-biology/fulltext/S0960-9822(20)30567-4?_returnURL=https%3A%2F%2Flinkinghub.elsevier.com%2Fretrieve%2Fpii%2FS0960982220305674%3Fshowall%3Dtrue
72	2017.09	Dioscorea rotundata	Plantae Angiosperms Monocots Dioscoreales Dioscoreaceae Dioscorea D. polystachya	BMC Genomics	594 Mb	2n=2x=40	4,723 scaffolds	×	×		Japan	https://bmcbiol.biomedcentral.com/articles/10.1186/s12915-017-0419-x
73	2018	Dioscorea zingiberensis	Plantae Tracheophyta Angiosperms Monocots Dioscoreales Dioscoreaceae Dioscorea D. zingiberensis	Genome	800Mb	2n=40	334,288 contigs	×	×		China	https://cdnsciencepub.com/doi/10.1139/gen-2018-0011
73	2020.06	Dioscorea zingiberensis	Plantae Tracheophyta Angiosperms Monocots Dioscoreales Dioscoreaceae Dioscorea D. zingiberensis	Plant communications	480.27 Mb	2n=40	16,452 scaffolds	×	×		China	https://www.sciencedirect.com/science/article/pii/S2590346220301024
74	2021.05	Diospyros lotus	Plantae Angiosperms Eudicots Asterids Ericales Ebenaceae Diospyros D. lotus	Forestry Research	seedless: 617.66 Mb seeded: 647.31 Mb	2n=30	✔	×	×		China	http://www.maxapress.com/article/id/60a195e5ce60b9321f2b8bcc
75	2018.12	Dracaena cambodiana	Plantae Tracheophyta Angiosperms Monocots Asparagales Asparagaceae Dracaena D. cambodiana	plos ONE	1.05 Gb	2n=40	2,379,659 scaffolds	✔	×		China	https://journals.plos.org/plosone/article?id=10.1371/journal.pone.0209258
76	2021.04	Eleutherococcus senticosus	Plantae Tracheophyta Angiosperms Eudicots Asterids Apiales Araliaceae Eleutherococcus E. senticosus	Molecular Ecology Resources	1.30 Gb	2n=48	✔	×	×		China	https://onlinelibrary.wiley.com/doi/10.1111/1755-0998.13403
77	2022.06.04	Entada phaseoloides	Plantae Tracheophytes Angiosperms Eudicots Rosids Fabales Fabaceae Caesalpinioideae Mimosoid clade Entada E. phaseoloides	Molecular Ecology Resources	456.18 Mb	2n=28	✔	✔	✔		China	https://onlinelibrary.wiley.com/doi/abs/10.1111/1755-0998.13662
78	2017.06	Erigeron breviscapus	Plantae Tracheophyta Angiosperms Eudicots Asterids Asterales Asteraceae Erigeron E. breviscapus	Giga science	1.2 Gb	2n=18	464,088 contigs	×	×		China	https://academic.oup.com/gigascience/article/6/6/gix028/3738246
78	2020	Erigeron breviscapus	Plantae Tracheophyta Angiosperms Eudicots Asterids Asterales Asteraceae Erigeron E. breviscapus	Molecular Ecology Resources	1.43Gb	2n=18	18,973 contigs	✔	✔		China	https://onlinelibrary.wiley.com/doi/full/10.1111/1755-0998.13257
79	2020.03	Eriobotrya japonica	Plantae Tracheophyta Angiosperms Eudicots Rosids Rosales Rosaceae Eriobotrya E. japonica	Giga science	760.1 Mb	2n=34	✔	×	×		China	https://academic.oup.com/gigascience/article/9/3/giaa015/5788433?login=false
80	2017.12	Eschscholzia californica	Plantae Tracheophyta Angiosperms Eudicots Ranunculales Papaveraceae Eschscholzia E. californica	Plant & Cell Physiology	489 Mb	2n=12	53,253 scaffolds	×	×		Japan	https://academic.oup.com/pcp/article/59/2/222/4781735
81	2018	Eucommia ulmoides	Plantae Angiosperms Eudicots Asterids Garryales Eucommiaceae Eucommia Oliv. E. ulmoides	Molecular Plant	1.2Gb	2n=34	29,152 superscaffolds	✔	×		China	https://www.sciencedirect.com/science/article/pii/S1674205217303696
81	2020.11	Eucommia ulmoides	Plantae Angiosperms Eudicots Asterids Garryales Eucommiaceae Eucommia Oliv. E. ulmoides	Horticulture Research	947.86 Mb	2n=34	✔	✔	×		China	https://www.nature.com/articles/s41438-020-00406-w?utm_source=xmol&utm_medium=affiliate&utm_content=meta&utm_campaign=DDCN_1_GL01_metadata
82	2020.02	Euryale ferox Ceratophyllum demersum	Plantae Tracheophyta Angiosperms Nymphaeales Nymphaeaceae Nymphaeoideae Euryale E. ferox	Nature Plants	725.2 Mb 733.3 Mb	2n=58 2n=24	✔	×	×		China	https://www.nature.com/articles/s41477-020-0594-6
83		Ceratophyllum demersum
84	2017	Fagopyrum tataricum	Plantae Tracheophytes Angiosperms Eudicots Caryophyllales Polygonaceae Fagopyrum F. tataricum	Molecular Plant	489.3 Mb	2n=16	✔	✔	×		China	https://www.sciencedirect.com/science/article/pii/S1674205217302435
85	2020.08	Forsythia suspensa	Plantae Angiosperms Eudicots Asterids Lamiales Oleaceae Forsythia F. suspensa	Horticulture Research	737.47Mb	2n=28	1,214 contigs	×	×		China	https://www.nature.com/articles/s41438-020-00352-7
86	2020.06	Gardenia jasminoides	Plantae Tracheophyta Angiosperms Eudicots Asterids Gentianales Rubiaceae Gardenia G. jasminoides	BMC Biology	535 Mb	2n=22	✔	✔	✔		China	https://bmcbiol.biomedcentral.com/articles/10.1186/s12915-020-00795-3		China-taiwan
87	2018	Gastrodia elata	Plantae Tracheophyta Angiosperms Monocots Asparagales Orchidaceae Epidendroideae Gastrodieae Gastrodiinae Gastrodia G. elata	Nature Communications	1.06Gb	2n=36	3,779 scaffolds	✔	×		China	https://www.nature.com/articles/s41467-018-03423-5?utm_source=xmol&utm_medium=affiliate&utm_content=meta&utm_campaign=DDCN_1_GL01_metadata
87	2021.10	Gastrodia elata	Plantae Tracheophyta Angiosperms Monocots Asparagales Orchidaceae Epidendroideae Gastrodieae Gastrodiinae Gastrodia G. elata	The Plant Journal	1.092 Gb	2n=36	✔	×	×		China	https://onlinelibrary.wiley.com/doi/10.1111/tpj.15528
87	2020	Gastrodia elata	Plantae Tracheophyta Angiosperms Monocots Asparagales Orchidaceae Epidendroideae Gastrodieae Gastrodiinae Gastrodia G. elata	Frontiers in Genetics	1.12Gb	2n=36	69,353 contigs	×	×		China	https://www.frontiersin.org/articles/10.3389/fgene.2020.580568/full
87	2022	Gastrodia elata	Plantae Tracheophyta Angiosperms Monocots Asparagales Orchidaceae Epidendroideae Gastrodieae Gastrodiinae Gastrodia G. elata	G3: Genes, Genomes, Genetics	1045Mb	2n=36	✔	✔	×		Korea	https://academic.oup.com/g3journal/article/12/3/jkab433/6511440
88	2019.08	Gelsemium elegans	Plantae Angiosperms Eudicots Asterids Gentianales Loganiaceae Gelsemium G. elegans	Acta Pharmaceutica Sinica B	335.13 Mb	2n=16	✔	×	×		China	https://www.sciencedirect.com/science/article/pii/S2211383519305143
89	2018.10	Gelsemium sempervirens	Plantae Tracheophytes Angiosperms Eudicots Asterids Gentianales Gelsemiaceae Gelsemium G. sempervirens	ChemBioChem	244 Mb	2n=16	×	×	×		UK	https://chemistry-europe.onlinelibrary.wiley.com/doi/10.1002/cbic.201800592
90	2016	Ginkgo biloba	Plantae Ginkgophyta Ginkgoopsida Ginkgoales Ginkgoaceae Ginkgo G. biloba	Giga science	10.61Gb	2n=24	6,990,752 contigs	×	×		China	https://academic.oup.com/gigascience/article/5/1/s13742-016-0154-1/2737429
90	2021.06	Ginkgo biloba	Plantae Ginkgophyta Ginkgoopsida Ginkgoales Ginkgoaceae Ginkgo G. biloba	Nature Plants	9.87 Gb	2n=24	✔	✔	×		China	https://www.nature.com/articles/s41477-021-00933-x
91	2016.10	Glycyrrhiza uralensis	Plantae Angiosperms Eudicots Rosids Fabales Fabaceae Faboideae Glycyrrhiza G. uralensis	The Plant Journal	400.95 Mb	2n=16	12,528 scaffolds	✔	×		Japan	https://onlinelibrary.wiley.com/doi/full/10.1111/tpj.13385
92	2018.01	Gnetum montanum	Plantae Gnetophyta Gnetopsida Gnetales Gnetaceae Gnetum G. montanum	Nature Plants	4.07 Gb	2n=44	142,000 scaffolds	✔	×		China	https://www.nature.com/articles/s41477-017-0097-2
93	2021.04	Hemerocallis citrina	Plantae Tracheophytes Angiosperms Monocots Asparagales Asphodelaceae Hemerocallidoideae Hemerocallis H. citrina	Horticulture Research	3.77 Gb	2n=22	✔	✔	✔		China	https://www.nature.com/articles/s41438-021-00539-6
94	2017.02	Hibiscus syriacus	Plantae Tracheophyta Angiosperms Eudicots Rosids Malvales Malvaceae Hibiscus H. syriacus	DNA Research	1,748 Mb	2n=4x=80	77,492 scaffolds	×	×		Korea	https://academic.oup.com/dnaresearch/article/24/1/71/2726856
95	2020.12	Hypericum perforatum	Plantae Angiosperms Eudicots Rosids Malpighiales Hypericaceae Hypericum H. perforatum	Journal of Pineal Research	373.65 Mb	2n=16	448 scaffolds	✔	×		China	https://onlinelibrary.wiley.com/doi/abs/10.1111/jpi.12709
96	2020.02	Isatis indigotica	Plantae Angiosperms Eudicots Rosids Brassicales Brassicaceae Isatis I. tinctoria	Horticulture Research	293.88 Mb	2n=14	✔	✔	×		China	https://www.nature.com/articles/s41438-020-0240-5
97	2021.05	Jacaranda mimosifolia	Plantae Tracheophytes Angiosperms Eudicots Asterids Lamiales Bignoniaceae Jacaranda J. mimosifolia	Genome Biology and Evolution	688.76 Mb	2n=2x=36	✔	×	×		China	https://academic.oup.com/gbe/article/13/6/evab094/6263831?login=false
98	2010.12	Jatropha curcas	Plantae Tracheophyta Angiosperms Eudicots Rosids Malpighiales Euphorbiaceae Jatropha J. curcas	DNA Research	285 Mb	2n=22	29,831 Singlets	×	×		Japan	https://academic.oup.com/dnaresearch/article/18/1/65/377199?login=true
98	2020.02	Jatropha curcas	Plantae Tracheophyta Angiosperms Eudicots Rosids Malpighiales Euphorbiaceae Jatropha J. curcas	Giga science	379.1 Mb	2n=22	✔	✔	×		China	https://academic.oup.com/gigascience/article/9/2/giaa009/5734639?login=false
98	2020.02	Jatropha curcas	Plantae Tracheophyta Angiosperms Eudicots Rosids Malpighiales Euphorbiaceae Jatropha J. curcas	3 Biotech	266.8 Mb	2n=22	1,231 contigs	✔	×		India	https://link.springer.com/article/10.1007/s13205-020-2082-0
99	2016	Juglans regia	Plantae Angiosperms Eudicots Rosids Fagales Juglandaceae Juglans J. regia	The Plant Journal	667Mb	2n=32	221,640 contigs	×	✔		USA	https://onlinelibrary.wiley.com/doi/10.1111/tpj.13207
99	2020.01	Juglans regia	Plantae Angiosperms Eudicots Rosids Fagales Juglandaceae Juglans J. regia	Plant Biotechnology Journal	540 Mb	2n=32	✔	✔	×		China	https://onlinelibrary.wiley.com/doi/10.1111/pbi.13350
99	2020.05	Juglans regia	Plantae Angiosperms Eudicots Rosids Fagales Juglandaceae Juglans J. regia	Giga science	567 Mb	2n=32	✔	✔	×		USA	https://www.ncbi.nlm.nih.gov/pmc/articles/PMC7238675/
100	2019.09	Kochia scoparia	Plantae Angiosperms Eudicots Caryophyllales Chenopodiaceae Bassia B. scoparia	Genome Biology and Evolution	711 Mb	2n=18	19,671 scaffolds	×	×		USA	https://academic.oup.com/gbe/article/11/10/2927/5569544
101	2017.09	Lagenaria siceraria	Plantae Tracheophytes Angiosperms Eudicots Rosids Cucurbitales Cucurbitaceae Lagenaria L. siceraria	The Plant Journal	313.4 Mb	2n=2x=22	✔	×	×		USA	https://onlinelibrary.wiley.com/doi/10.1111/tpj.13722
102	2018.09	Lavandula angustifolia	Plantae Tracheophytes Angiosperms Eudicots Asterids Lamiales Lamiaceae Lavandula L. angustifolia	Planta	688 Mb	2n=54	84,291 scaffolds	×	×		Canada	https://link.springer.com/article/10.1007/s00425-018-3012-9
102	2021.03	Lavandula angustifolia	Plantae Tracheophytes Angiosperms Eudicots Asterids Lamiales Lamiaceae Lavandula L. angustifolia	Horticulture Research	894.50 Mb	2n=54	✔	✔	×		China	https://www.nature.com/articles/s41438-021-00490-6
103	2016.07	Lepidium meyenii	Plantae Tracheophytes Angiosperms Eudicots Rosids Brassicales Brassicaceae Lepidium L. meyenii	Molecular Plant	743 Mb	2n=8x=64	×	✔	×		China	https://www.cell.com/molecular-plant/fulltext/S1674-2052(16)30053-3?_returnURL=https%3A%2F%2Flinkinghub.elsevier.com%2Fretrieve%2Fpii%2FS1674205216300533%3Fshowall%3Dtrue
104	2022	Lindera glauca	Plantae Angiospermae Magnoliopsida Laurales Lauraceae Lindera L.glauca	iScience	2,092.2 Mb	2n=24	✔	✔	✔		China	https://www.sciencedirect.com/science/article/pii/S2589004222010331
105	2012.07	Linum usitatissimum	Plantae Tracheophytes Angiosperms Eudicots Rosids Malpighiales Linaceae Linum L. usitatissimum	The Plant Journal	318 Mb	2n=30	88,384 scaffolds	×	×		Canada	https://onlinelibrary.wiley.com/doi/10.1111/j.1365-313X.2012.05093.x
105	2021.09	Linum usitatissimum	Plantae Tracheophytes Angiosperms Eudicots Rosids Malpighiales Linaceae Linum L. usitatissimum	Frontiers in Plant Science	454.95 Mb	2n=30	✔	×	×		China	https://www.frontiersin.org/articles/10.3389/fgene.2021.735690/full
106	2020.06	Lithospermum erythrorhizon	Plantae Tracheophytes Angiosperms Eudicots Asterids Boraginales Boraginaceae Lithospermum L. erythrorhizon	Horticulture Research	367.41 Mb	2n=28	2,465 contigs	✔	×		USA	https://www.nature.com/articles/s41438-020-0301-9
107	2020.04	Litsea cubeba	Plantae Angiosperms Magnoliids Laurales Lauraceae Litsea L. cubeba	Nature Communications	1325.69 Mb	2n=24	✔	✔	×		China	https://www.nature.com/articles/s41467-020-15493-5
108	2020.03	Lonicera japonica	Plantae Angiosperms Eudicots Asterids Dipsacales Caprifoliaceae Lonicera L. japonica	New Phytologist	843.2 Mb	2n=18	✔	✔	✔		China	https://nph.onlinelibrary.wiley.com/doi/full/10.1111/nph.16552
108	2022.05.24	Lonicera japonica	Plantae Angiosperms Eudicots Asterids Dipsacales Caprifoliaceae Lonicera L. japonica	Scientific Data	886.04 Mb	2n=18	✔	✔	×		China	https://www.nature.com/articles/s41597-022-01385-4?utm_source=xmol&utm_medium=affiliate&utm_content=meta&utm_campaign=DDCN_1_GL01_metadata
109	2020.08	Luffa acutangula Luffa cylindrica	Plantae Tracheophytes Angiosperms Eudicots Rosids Cucurbitales Cucurbitaceae Luffa	Molecular Ecology Resources	734.6 Mb 689.8 Mb	2n=26	✔	×	×		Thailand	https://www.nature.com/articles/s41438-020-00350-9
110		Luffa cylindrica												https://www.jstor.org/stable/23674717
110	2020	Luffa cylindrica	Plantae Tracheophytes Angiosperms Eudicots Rosids Cucurbitales Cucurbitaceae Luffa	Molecular Ecology Resources	669Mb	2n=26	✔	×	×		China	https://onlinelibrary.wiley.com/doi/abs/10.1111/1755-0998.13129
110	2020.07	Luffa cylindrica	Plantae Tracheophytes Angiosperms Eudicots Rosids Cucurbitales Cucurbitaceae Luffa	Horticulture Research	656.19 Mb	2n=26	✔	×	×		China	https://www.nature.com/articles/s41438-020-00350-9
111	2016.08	Lupinus angustifolius	Plantae Angiosperms Eudicots Rosids Fabales Fabaceae Faboideae Genisteae Lupinineae Lupinus L. angustifolius	Plant Biotechnology Journal	609 Mb	2n=40	✔	×	×		Australia	https://onlinelibrary.wiley.com/doi/10.1111/pbi.12615
112	2021.06	Lycium barbarum	Plantae Angiosperms Eudicots Asterids Solanales Solanaceae Lycium L. barbarum	Communications Biology	1.67 Gb	2n=24	✔	✔	×		China	https://www.nature.com/articles/s42003-021-02152-8?utm_source=xmol&utm_medium=affiliate&utm_content=meta&utm_campaign=DDCN_1_GL01_metadata
113	2017.05	Macleaya cordata	Plantae Angiosperms Eudicots Ranunculales Papaveraceae Macleaya M. cordata	Molecular Plant	378 Mb	2n=20	4,551 scaffolds	✔	✔		China	https://www.sciencedirect.com/science/article/pii/S1674205217301399
114	2021.03	Magnolia biondii	Plantae Tracheophytes Angiosperms Magnoliids Magnoliales Magnoliaceae Magnolia Magnolia subg. Yulania Magnolia sect. Yulania Magnolia subsect. Yulania M. biondii	Horticulture Research	2.22 Gb	2n=38	✔	✔	×		China	https://www.nature.com/articles/s41438-021-00471-9
115	2019.07	Malus baccata	Plantae Angiosperms Eudicots Rosids Rosales Rosaceae Malus M. baccata	G3: Genes, Genomes, Genetics	718.98 Mb	2n=34	296,545 scaffolds	×	×		China	https://academic.oup.com/g3journal/article/9/7/2051/6026803
116	2019.11	Marchantia polymorpha	Plantae Marchantiophyta Marchantiopsida Marchantiales Marchantiaceae Marchantia M. polymorpha	The Plant Journal	199 Mb	2n=18	✔	×	×		Switzerland	https://onlinelibrary.wiley.com/doi/full/10.1111/tpj.14602
116	2017.10	Marchantia polymorpha	Plantae Marchantiophyta Marchantiopsida Marchantiales Marchantiaceae Marchantia M. polymorpha	Cell	225.8 Mb	2n=18(16autosomes)	2,957 scaffolds	✔	×		Australia	https://www.cell.com/cell/fulltext/S0092-8674(17)31124-8?_returnURL=https%3A%2F%2Flinkinghub.elsevier.com%2Fretrieve%2Fpii%2FS0092867417311248%3Fshowall%3Dtrue
116	2020.02	Marchantia polymorpha	Plantae Marchantiophyta Marchantiopsida Marchantiales Marchantiaceae Marchantia M. polymorpha	Current Biology	218.7 Mb	2n=18	✔	×	×		Australia	https://www.cell.com/current-biology/fulltext/S0960-9822(19)31610-0?_returnURL=https%3A%2F%2Flinkinghub.elsevier.com%2Fretrieve%2Fpii%2FS0960982219316100%3Fshowall%3Dtrue
117	2020	Medicago sativa spp. caerulea / diploid	Plantae Angiospermae Magnoliopsida Fabales Fabaceae Medicago M.sativa	Horticulture Research	793.2Mb	2n=4x=32	✔	✔	×		China	https://www.nature.com/articles/s41438-020-00417-7?utm_source=xmol&utm_medium=affiliate&utm_content=meta&utm_campaign=DDCN_1_GL01_metadata
117	2020	Medicago sativa Zhongmu No.1 /haploid	Plantae Angiospermae Magnoliopsida Fabales Fabaceae Medicago M.sativa	Molecular Plant	816Mb	2n=4x=32	✔	×	×		China	https://www.sciencedirect.com/science/article/pii/S1674205220302161
117	2020	Medicago sativa/autotetraploid	Plantae Angiospermae Magnoliopsida Fabales Fabaceae Medicago M.sativa	Nature Communications	685Mb	2n=4x=32	✔	✔	×		China	https://www.nature.com/articles/s41467-020-16338-x?utm_source=xmol&utm_medium=affiliate&utm_content=meta&utm_campaign=DDCN_1_GL01_metadata
117	2021	Medicago sativa	Plantae Angiospermae Magnoliopsida Fabales Fabaceae Medicago M.sativa	BMC Biology	904.13Mb	2n=2x=16	✔	✔	×		China	https://bmcbiol.biomedcentral.com/articles/10.1186/s12915-021-01033-0?utm_source=xmol&utm_medium=affiliate&utm_content=meta&utm_campaign=DDCN_1_GL01_metadata
118	2016.11	Mentha longifolia	Plantae Angiosperms Eudicots Asterids Lamiales Lamiaceae Mentha M. longifolia	Molecular Plant	353 Mb	2n=24	190,876 contigs	✔	×		USA	https://www.sciencedirect.com/science/article/pii/S1674205216302659#fig1
119	2020.10	Mesua ferrea	Plantae Tracheophytes Angiosperms Eudicots Rosids Malpighiales Calophyllaceae Mesua M. ferrea	Gene	614 Mb	2n=30	503,130 scaffolds	×	×		India	https://www.sciencedirect.com/science/article/abs/pii/S0378111920308830
120	2021.05	Miscanthus floridulus	Plantae Angiosperms Monocots Commelinids Poales Poaceae Miscanthus M. floridulus	Nature plants	2.68 Gb	2n=38	✔	✔	×		China	https://www.nature.com/articles/s41477-021-00908-y?utm_source=xmol&utm_medium=affiliate&utm_content=meta&utm_campaign=DDCN_1_GL01_metadata
121	2021.03	Mitragyna speciosa	Plantae Angiosperms Eudicots Asterids Gentianales Rubiaceae Mitragyna M. Mitragyna speciosa	G3: Genes, Genomes, Genetics	1.12 Gb	2n=4x=44	17,031 scaffolds	×	×		USA	https://academic.oup.com/g3journal/article/11/4/jkab058/6156838
122	2017	Momordica charantia	Plantae Angiosperms Eudicots Rosids Cucurbitales Cucurbitaceae Momordica M. charantia	DNA Research	285.5Mb	2n=2x=22	1,029 Scaffolds	✔	×		Japan	https://academic.oup.com/dnaresearch/article/24/1/51/2709597
122	2020.05	Momordica charantia	Plantae Angiosperms Eudicots Rosids Cucurbitales Cucurbitaceae Momordica M. charantia	PNAS	291.7 Mb	2n=22	✔	×	×		China	https://www.pnas.org/content/117/25/14543
123	2021.06	Morinda officinalis	Plantae Angiosperms Eudicots Asterids Gentianales Rubiaceae Morinda M. officinalis	Horticulture Research	484.45 Mb	2n=22	✔	✔	×		China	https://www.nature.com/articles/s41438-021-00551-w?utm_source=xmol&utm_medium=affiliate&utm_content=meta&utm_campaign=DDCN_1_GL01_metadata#Abs1
124	2015	Moringa oleifera	Plantae Tracheophytes Angiosperms Eudicots Rosids Brassicales Moringaceae Moringa M. oleifera	Science China Life Sciences	315Mb	2n=28	13512contigs	✔	×		China	https://link.springer.com/article/10.1007/s11427-015-4872-x
124	2019	Moringa oleifera	Plantae Tracheophytes Angiosperms Eudicots Rosids Brassicales Moringaceae Moringa M. oleifera	Giga science	216.76Mb	2n=28	2,166 Scaffolds	✔	✔		China	https://academic.oup.com/gigascience/article/8/3/giy152/5232229?login=false
124	2021.12	Moringa oleifera	Plantae Tracheophytes Angiosperms Eudicots Rosids Brassicales Moringaceae Moringa M. oleifera	Frontiers in Plant Science	281 Mb	2n=28	915 contigs	✔	×		India	https://www.frontiersin.org/articles/10.3389/fpls.2021.766999/full
125	2013.09	Morus notablilis	Plantae Tracheophytes Angiosperms Eudicots Rosids Rosales Moraceae Morus M. notabilis	Nature Communications	330 Mb	2n=14	681 scaffolds	×	×		China	https://www.nature.com/articles/ncomms3445
126	2019	Myrica rubra	Plantae Angiospermae Magnoliopsida Fagales Myricaceae Morella M.rubra	BMC Genomics	289.92Mb	2n=16	✔	✔	✔		China	https://bmcgenomics.biomedcentral.com/articles/10.1186/s12864-019-5818-7
127	2013	Nelumbo nucifera	Plantae Angiosperms Eudicots Proteales Nelumbonaceae Nelumbo N. nucifera	Genome Biology	929Mb	2n=16	429 scaffolds	✔	×		China	https://genomebiology.biomedcentral.com/articles/10.1186/gb-2013-14-5-r41
127	2013.05	Nelumbo nucifera	Plantae Angiosperms Eudicots Proteales Nelumbonaceae Nelumbo N. nucifera	Genome Biology	804 Mb	2n=16	429 scaffolds	✔	×		USA	https://genomebiology.biomedcentral.com/articles/10.1186/gb-2013-14-5-r41
127	2020.04	Nelumbo nucifera	Plantae Angiosperms Eudicots Proteales Nelumbonaceae Nelumbo N. nucifera	Molecular Biology and Evolution	799.7 Mb	2n=16	✔	✔	×		China	https://academic.oup.com/mbe/article/37/8/2394/5826357?login=true
128	2017.06	Nicotiana tabacum	Plantae Angiosperms Eudicots Asterids Solanales Solanaceae Nicotiana N. tabacum	BMC Genomics	4.5 Gb	2n=4x=48	✔	✔	×		USA	https://bmcgenomics.biomedcentral.com/articles/10.1186/s12864-017-3791-6
128	2014.05	Nicotiana tabacum Nicotiana otophora	Plantae Angiosperms Eudicots Asterids Solanales Solanaceae Nicotiana N. tabacum	Nature Communications	4.60Gb&4.41Gb&4.57Gb 2.70Gb	2n=4x=48 2n=24	✔	✔	×		Switzerland	https://www.nature.com/articles/ncomms4833
129		Nicotiana otophora
130	2020	Ocimum basilicum	Plantae Angiosperms Eudicots Asterids Lamiales Lamiaceae Ocimum O. basilicum	DNA Research	2.13Gb	2n=4x=48	12,212 scaffolds	✔	×		Israel	https://academic.oup.com/dnaresearch/article/27/5/dsaa027/6042144?login=false
130	2020.07	Ocimum basilicum Origanum majorana Origanum vulgare Rosmarinus officinalis	Plantae Angiosperms Eudicots Asterids Lamiales Lamiaceae Ocimum O. basilicum	DNA Research	2067.62 Mb 760.89 Mb 630.04 Mb 1013.85 Mb	2n=4x=48 2n=2x=30 2n=2x=28,30,32 2n=20,24	×	×	×		USA	https://academic.oup.com/dnaresearch/article/27/3/dsaa016/5879280
131		Origanum majorana
132		Origanum vulgare
133		Rosmarinus officinalis
134	2015.08	Ocimum tenuiflorum	Plantae Tracheophytes Angiosperms Eudicots Asterids Lamiales Lamiaceae Ocimum O. tenuiflorum	BMC Plant Biology	374 Mb	2n=36	78,224 scaffolds	✔	×		India	https://bmcplantbiol.biomedcentral.com/articles/10.1186/s12870-015-0562-x
135	2016.06	Olea europae	Plantae Angiosperms Eudicots Asterids Lamiales Oleaceae Olea O. europaea	Giga science	1.31 Gb	2n=2x=46	11,038 scaffolds	✔	×		Spain	https://www.ncbi.nlm.nih.gov/pmc/articles/PMC4922053/
135	2021.04	Olea europae	Plantae Angiosperms Eudicots Asterids Lamiales Oleaceae Olea O. europaea	Horticulture Research	1.1 Gb	2n=2x=46	✔	×	×		China	https://www.nature.com/articles/s41438-021-00498-y
136	2021.01	Ophiorrhiza pumila	Plantae Angiosperms Eudicots Asterids Gentianales Rubiaceae Ophiorrhiza O. pumila	Nature Communications	439.9 Mb	2n=22	✔	✔	✔		Japan	https://www.nature.com/articles/s41467-020-20508-2
137	2018.11	Osmanthus fragrans	Plantae Tracheophytes Angiosperms Eudicots Asterids Lamiales Oleaceae Osmanthus O. fragrans	Horticulture Research	727 Mb	2n=46	✔	✔	✔		China	https://www.nature.com/articles/s41438-018-0108-0
138	2020.05	Paeonia suffruticosa	Plantae Tracheophytes Angiosperms Eudicots Saxifragales Paeoniaceae Paeonia P. × suffruticosa	Ecology and Evolution	13.79 Gb	2n=10	499,810 contigs	✔	×		China	https://onlinelibrary.wiley.com/doi/full/10.1002/ece3.5965
139	2017.10	Panax ginseng	Plantae Tracheophytes Angiosperms Eudicots Asterids Apiales Araliaceae Panax P. ginseng	Giga science	3.43 Gb	2n=48	83,074 scaffolds	✔	×		China	https://academic.oup.com/gigascience/article/6/11/gix093/4345651?login=true
139	2018.03	Panax ginseng	Plantae Tracheophytes Angiosperms Eudicots Asterids Apiales Araliaceae Panax P. ginseng	The Plant Journal	2.98 Gb	2n=48	9,845 scaffolds	✔	×		Korea	https://onlinelibrary.wiley.com/doi/full/10.1111/pbi.12926
140	2017	Panax notoginseng	Plantae Angiosperms Eudicots Asterids Apiales Araliaceae Panax P. notoginseng	Molecular Plant	2.31Gb	2n=2x=24	contig N50 = 16 kb	✔	×		China	https://www.cell.com/molecular-plant/fulltext/S1674-2052(17)30070-9?_returnURL=https%3A%2F%2Flinkinghub.elsevier.com%2Fretrieve%2Fpii%2FS1674205217300709%3Fshowall%3Dtrue
140	2017.03	Panax notoginseng	Plantae Angiosperms Eudicots Asterids Apiales Araliaceae Panax P. notoginseng	Molecular Plant	1.885 Gb	2n=2x=24	76,517 scaffolds	✔	×		China	https://www.cell.com/molecular-plant/fulltext/S1674-2052(17)30073-4?_returnURL=https%3A%2F%2Flinkinghub.elsevier.com%2Fretrieve%2Fpii%2FS1674205217300734%3Fshowall%3Dtrue
140	2020.09	Panax notoginseng	Plantae Angiosperms Eudicots Asterids Apiales Araliaceae Panax	Plant communications	2.66 Gb	2n=24	✔	✔	×		China	https://www.sciencedirect.com/science/article/pii/S2590346220301449
140	2020.09	Panax notoginseng	Plantae Angiosperms Eudicots Asterids Apiales Araliaceae Panax P. notoginseng	iScience	2.24 Gb	2n=24	✔	✔	×		China	https://www.sciencedirect.com/science/article/pii/S2589004220307306
140	2021.02	Panax notoginseng	Plantae Angiosperms Eudicots Asterids Apiales Araliaceae Panax P. ginseng	Plant Biotechnology Journal	2.31 Gb	2n=24	✔	✔	×		China	https://onlinelibrary.wiley.com/doi/full/10.1111/pbi.13558
141	2018.08	Papaver somniferum	Plantae Angiosperms Eudicots Ranunculales Papaveraceae Papaver Papaver P. somniferum	Science	2.72 Gb	2n=22	✔	✔	×		China	https://www.science.org/doi/abs/10.1126/science.aat4096
141	2021.01	Papaver somniferum	Plantae Angiosperms Eudicots Ranunculales Papaveraceae Papaver Papaver P. somniferum	Horticulture Research	2.62 Gb	2n=22	✔	✔	×		China	https://www.nature.com/articles/s41438-020-00435-5
142	2020.06	Paris polyphylla	Plantae Angiosperms Monocots Liliales Paris P. polyphylla	bioRxiv	70.18 Gb	2n=10	15,306,712 scaffolds	✔	×		China	https://www.biorxiv.org/content/10.1101/2020.06.01.126920v1.full
143	2020.12	Passiflora edulis	Plantae Angiosperms Eudicots Rosids Malpighiales Passifloraceae Passiflora P. edulis	Molecular Ecology Resources	1.28 Gb	2n=18	✔	✔	×		China	https://onlinelibrary.wiley.com/doi/abs/10.1111/1755-0998.13310?af=R
143	2021.01	Passiflora edulis	Plantae Angiosperms Eudicots Rosids Malpighiales Passifloraceae Passiflora P. edulis	Horticulture Research	1.34 Gb	2n=18	✔	✔	✔		China	https://www.nature.com/articles/s41438-020-00455-1
144	2019.08	Phytolacca americana	Plantae Tracheophytes Angiosperms Eudicots Caryophyllales Phytolaccaceae Phytolacca P. americana	Frontiers in Plant Science	0.93 Gb	2n=36	847,766 scaffolds	✔	×		Canada	https://www.frontiersin.org/articles/10.3389/fpls.2019.01002/full
145	2019.10	Piper nigrum	Plantae Angiosperms Magnoliids Piperales Piperaceae Piper P. nigrum	Nature Communications	761.2 Mb	2n=52	45 scaffolds	✔	×		China	https://www.nature.com/articles/s41467-019-12607-6
146	2016.12	Pistacia vera	Plantae Angiosperms Eudicots Rosids Sapindales Anacardiaceae Pistacia P. vera	BMC Genomics	513.5 Mb	2n=30	27,069 scaffolds	×	×		Turkey	https://bmcgenomics.biomedcentral.com/articles/10.1186/s12864-016-3359-x?utm_source=xmol&utm_medium=affiliate&utm_content=meta&utm_campaign=DDCN_1_GL01_metadata
146	2019.04	Pistacia vera	Plantae Angiosperms Eudicots Rosids Sapindales Anacardiaceae Pistacia P. vera	Genome Biology	671 Mb	2n=30	1,941 scaffolds	✔	×		China	https://genomebiology.biomedcentral.com/articles/10.1186/s13059-019-1686-3
147	2020.07	Platycodon grandiflorus	Plantae Angiosperms Eudicots Asterids Asterales Campanulaceae Platycodon P. grandiflorus	Horticulture Research	680.1 Mb	2n=18	4,815 scaffolds	✔	×		Korea	https://academic.oup.com/hr/article/doi/10.1038/s41438-020-0329-x/6445515?login=true
147	2022.04	Platycodon grandiflorus	Plantae Angiosperms Eudicots Asterids Asterales Campanulaceae Platycodon P. grandiflorus	Frontiers in Plant Science	622.86 Mb	2n=18	✔	×	×		China	https://www.frontiersin.org/articles/10.3389/fgene.2022.869784/full
148	2016.05	Pogostemon cablin /diploid	Plantae Angiosperms Eudicots Asterids Lamiales Lamiaceae Pogostemon P. cablin	Scientific Reports	1.15 Gb	2n=64	1,608,748 scaffolds	×	×		China	https://www.nature.com/articles/srep26405
148	2018.12	Pogostemon cablin / octaploid	Plantae Angiosperms Eudicots Asterids Lamiales Lamiaceae Pogostemon P. cablin	Scientific Data	1.91 Gb	2n=64	3,543 scaffolds	✔	×		China	https://www.nature.com/articles/sdata2018274?utm_source=xmol&utm_medium=affiliate&utm_content=meta&utm_campaign=DDCN_1_GL01_metadata
148	2022	Pogostemon cablin	Plantae Angiosperms Eudicots Asterids Lamiales Lamiaceae Pogostemon P. cablin	Nature Communications	1.94Gb	2n=64	✔	✔	✔		China	https://www.nature.com/articles/s41467-022-31121-w
149	2019.10	Polygonum cuspidatum(Reynoutria japonica)	Plantae Angiosperms Eudicots Caryophyllales Polygonaceae Reynoutria R. japonica	Frontiers in Plant Science	2.56 Gb	2n=44&88	948,118 scaffolds	✔	×		China	https://www.frontiersin.org/articles/10.3389/fpls.2019.01274/full
150	2020.09	Poncirus trifoliata	Plantae Angiosperms Eudicots Rosids Sapindales Rutaceae Aurantioideae Citreae Citrus C. trifoliata	The Plant Journal	264.9 Mb	2n=18	✔	×	×		USA	https://onlinelibrary.wiley.com/doi/10.1111/tpj.14993
151	2015.01	Primula veris	Plantae Tracheophyta Angiosperms Eudicots Asterids Ericales Primulaceae Primula P. veris	Genome Biology	301.8 Mb	2n=2x=22	9,002 scaffolds	✔	×		Switzerland	https://genomebiology.biomedcentral.com/articles/10.1186/s13059-014-0567-z
152	2022.01	Pueraria montana	Plantae Angiosperms Dicotyledoneae Archichlamydeae Rosales Bercht Rosales Fabaceae Papilionoideae Pueraria P. montana	Horticulture Research	1.37 Gb	2n=2x=22	✔	✔	✔		China	https://academic.oup.com/hr/article/doi/10.1093/hr/uhab035/6511236
153	2017	Punica granatum	Plantae Angiospermae Magnoliopsida Myrtales Lythraceae Punica P.granatum	The Plant Journal	328.38 Mb	2n=2x=18	✔	✔	✔		China	https://onlinelibrary.wiley.com/doi/full/10.1111/tpj.13625
153	2018	Punica granatum	Plantae Angiospermae Magnoliopsida Myrtales Lythraceae Punica P.granatum	Plant Biotechnology Journal	274Mb	2n=2x=18	2,177 scaffolds	✔	×		China	https://onlinelibrary.wiley.com/doi/10.1111/pbi.12875
153	2020	Punica granatum	Plantae Angiospermae Magnoliopsida Myrtales Lythraceae Punica P.granatum	Plant Biotechnology Journal	320.31Mb	2n=2x=18	473scaffolds	✔	×		China	https://onlinelibrary.wiley.com/doi/full/10.1111/pbi.13260
153	2022	Punica granatum	Plantae Angiospermae Magnoliopsida Myrtales Lythraceae Punica P.granatum	Frontiers in Genetics	361.76Mb	2n=2x=18	661contigs	×	✔		India	https://www.frontiersin.org/articles/10.3389/fgene.2022.786825/full
154	2015.06	Raphanus sativus	Plantae Tracheophytes Angiosperms Eudicots Rosids Brassicales Brassicaceae Raphanus R. raphanistrum R. r. subsp. sativus	Scientific Reports	383 Mb	2n=2x=18	40,123 scaffolds	✔	×		Japan	https://www.nature.com/articles/srep10835
154	2020.04	Raphanus sativus	Plantae Tracheophytes Angiosperms Eudicots Rosids Brassicales Brassicaceae Raphanus R. raphanistrum R. r. subsp. sativus	DNA Research	504.5 Mb	2n=2x=18	✔	×	×		Japan	https://academic.oup.com/dnaresearch/article/27/2/dsaa010/5840486?login=true
155	2021.07	Rehmannia glutinosa	Plantae Angiosperms Eudicots Asterids Lamiales Orobanchaceae Rehmannia R. glutinosa	Computational and Structural Biotechnology Journal	2.49 Gb	4n=56	✔	✔	×		China	https://www.sciencedirect.com/science/article/pii/S2001037021002968
156	2017.06	Rhodiola crenulata	Plantae Angiosperms Eudicots Saxifragales Crassulaceae Rhodiola R. rosea	Giga science	344.5 Mb	2n=22	150,003 scaffolds	×	×		China	https://academic.oup.com/gigascience/article/6/6/gix033/3798566?login=false
157	2021.08	Rhododendron ovatum Rhododendron delavayi	Plantae Angiosperms Eudicots Asterids Ericales Ericaceae Rhododendron R. ovatum	Plant Biotechnology Journal	549 Mb 695 Mb	2n=26	✔	✔	✔		China	https://onlinelibrary.wiley.com/doi/10.1111/pbi.13680
158		Rhododendron delavayi
159	2010	Ricinus communis	Plantae Angiospermae Magnoliopsida Malpighiales Euphorbiaceae Ricinus R.communis	Nature Biotechnology	350 Mb	2n=2x=20	25,800 scaffolds	×	×		USA	https://www.nature.com/articles/nbt.1674
160	2018	Rosa chinensis	Plantae Angiospermae Magnoliopsida Rosales Rosaceae Rosa R.chinensis	Nature Plants	512 Mb	2n=14	551 contigs	✔	×		France	https://www.nature.com/articles/s41477-018-0166-1
160	2018	Rosa chinensis	Plantae Angiospermae Magnoliopsida Rosales Rosaceae Rosa R.chinensis	Nature Genetics	560 Mb	2n=14	15,938 scaffolds	×	✔		France	https://www.nature.com/articles/s41588-018-0110-3
161	2016	Rosa roxburghii	Plantae Angiospermae Magnoliopsida Rosales Rosaceae Rosa R.roxburghii	plos ONE	480.97 Mb	2n=2x=14	627,554contigs	×	✔		China	https://journals.plos.org/plosone/article?id=10.1371/journal.pone.0147530
162	2021.06	Rubus chingii	Plantae Angiosperms Eudicots Rosids Rosales Rosaceae Rubus R. chingii	The plant journal	231.21 Mb	2n=14	✔	✔	×		China	https://onlinelibrary.wiley.com/doi/10.1111/tpj.15394?af=R
163	2022.05.25	Rubus corchorifolius	Plantae Tracheophytes Angiosperms Eudicots Rosids Rosales Rosaceae Rubus R. corchorifolius	Genomics, Proteomics & Bioinformatics	215.69 Mb	2n=14	✔	✔	×		China	https://www.sciencedirect.com/science/article/pii/S1672022922000675
164	2016.05	Rubus occidentalis	Plantae Angiosperms Eudicots Rosids Rosales Rosaceae Rubus R. idaeus	The plant journal	243 Mb	2n=16	2,226 scaffolds	✔	×		USA	https://onlinelibrary.wiley.com/doi/10.1111/tpj.13215
165	2020.10	Rumex hastatulus	Plantae Angiosperms Eudicots Caryophyllales Polygonaceae Rumex R. hastatus	Molecular Biology and Evolution	1.64 Gb	2n=8	43,461 contigs	×	×		Canada	https://academic.oup.com/mbe/article/38/3/1018/5936534
166	2021.02	Salvia bowleyana	Plantae Angiosperms Eudicots Asterids Lamiales Lamiaceae Salvia S. bowleyana	Journal of Integrative Plant Biology	462.44 Mb	2n=16	✔	✔	×		China	https://onlinelibrary.wiley.com/doi/abs/10.1111/jipb.13085
167	2016.03	Salvia miltiorrhiza	Plantae Angiosperms Eudicots Asterids Lamiales Lamiaceae Salvia S. miltiorrhiza	Molecular Plant	538 Mb	2n=16	×	✔	×		China	https://www.cell.com/molecular-plant/fulltext/S1674-2052(16)30005-3?_returnURL=https%3A%2F%2Flinkinghub.elsevier.com%2Fretrieve%2Fpii%2FS1674205216300053%3Fshowall%3Dtrue#supplementaryMaterial
167	2020.09	Salvia miltiorrhiza	Plantae Angiosperms Eudicots Asterids Lamiales Lamiaceae Salvia S. miltiorrhiza	The Plant Genome	594.75 Mb	2n=16	✔	✔	×		China	https://acsess.onlinelibrary.wiley.com/doi/full/10.1002/tpg2.20041
168	2018.06	Salvia splendens	Plantae Tracheophyta Angiosperms Eudicots Asterids Lamiales Lamiaceae Salvia S. splendens	Giga science	808 Mb	2n=4x=46	1,525 scaffolds	×	×		China	https://academic.oup.com/gigascience/article/7/7/giy068/5040257?login=true
169	2018.02	Santalum album	Plantae Tracheophytes Angiosperms Eudicots Santalales Santalaceae Santalum S. album	plant physiology	221 Mb	2n=20	12,822 scaffolds	✔	×		India	https://academic.oup.com/plphys/article/176/4/2772/6116990?login=false
169	2019.04	Santalum album	Plantae Tracheophytes Angiosperms Eudicots Santalales Santalaceae Santalum S. album	Tree Genetics & Genomes	286 Mb	2n=20	74,900 scaffolds	×	×		India	https://link.springer.com/article/10.1007/s11295-019-1334-9
170	2019.04	Scutellaria baicalensis	Plantae Angiosperms Eudicots Asterids Lamiales Lamiaceae Scutellaria S. baicalensis	Molecular Plant	408.14 Mb	2n=18	✔	✔	×		China	https://www.sciencedirect.com/science/article/pii/S1674205219301315
171	2020.11	Scutellaria baicalensis Scutellaria barbata	Plantae Angiosperms Eudicots Asterids Lamiales Lamiaceae Scutellaria S. barbata	Genomics, Proteomics & Bioinformatics	441 Mb 404 Mb	2n=18 2n=26	✔	✔	×		China	https://www.sciencedirect.com/science/article/pii/S1672022920301261
172		Scutellaria barbata
173	2021.01	Sechium edule	Plantae Angiosperms Eudicots Rosids Cucurbitales Cucurbitaceae Sicyos S. edulis	Horticulture Research	606.42 Mb	2n=28	✔	✔	✔		China	https://www.nature.com/articles/s41438-021-00487-1
174	2018.07	Selaginella tamariscina	Plantae Lycopodiophyta Lycopodiopsida Selaginellales Selaginellaceae Selaginella S. tamariscina	Molecular Plant	301 Mb	2n=20	1,391 scaffolds	×	×		China	https://www.sciencedirect.com/science/article/pii/S167420521830162X
175	2020.11	Senna tora	Plantae Angiosperms Eudicots Rosids Fabales Fabaceae Senna S. tora	Nature Communications	526 Mb	2n=26	✔	✔	✔		Korea	https://www.nature.com/articles/s41467-020-19681-1
176	2013.01	Sesamum indicum	Plantae Tracheophytes Angiosperms Eudicots Asterids Lamiales Pedaliaceae Sesamum S. indicum	Genome Biology	293.7 Mb	2n=26	✔	×	×		China	https://www.ncbi.nlm.nih.gov/pmc/articles/PMC3663098/
176	2020	Sesamum indicum	Plantae Tracheophytes Angiosperms Eudicots Asterids Lamiales Pedaliaceae Sesamum S. indicum	Plant & Cell Physiology	292.3 Mb	2n=26	✔	✔	×		China	https://academic.oup.com/pcp/article/61/5/978/5802473?login=false
177	2020.3	Simmondsia chinensis	Plantae Tracheophytes Angiosperms Eudicots Caryophyllales Simmondsiaceae Simmondsia S. chinensis	Science Advances	887 Mb	2n=26	✔	✔	✔		China	https://www.science.org/doi/10.1126/sciadv.aay3240
178	2020.04	Sinapis alba	Plantae Tracheophyta Angiosperms Eudicots Rosids Brassicales Brassicaceae Sinapis S. alba	plos ONE	459 Mb	2n=2x=24	403,423 scaffolds	×	×		India	https://journals.plos.org/plosone/article?id=10.1371/journal.pone.0231002
179	2016	Siraitia grosvenorii	Plantae Angiosperms Eudicots Rosids Cucurbitales Cucurbitaceae Siraitia S. grosvenorii	PNAS	420 MB	2n=28	111,000 Siraitia contigs	✔	✔		Germany	https://www.pnas.org/doi/10.1073/pnas.1604828113
179	2018.06	Siraitia grosvenorii	Plantae Angiosperms Eudicots Rosids Cucurbitales Cucurbitaceae Siraitia S. grosvenorii	Giga science	469.5 Mb	2n=28	4,128 contigs	✔	×		China	https://academic.oup.com/gigascience/article/7/6/giy067/5034949
180	2022.01.05	Sorbus pohuashanensis	Plantae Tracheophytes Angiosperms Eudicots Rosids Rosales Rosaceae Sorbus	Journal of Genetics and Genomics	660 Mb	2n=34	✔	✔	×		China	https://www.sciencedirect.com/science/article/abs/pii/S1673852721003799
181	2019.07	Spatholobus suberectus	Plantae Angiosperms Eudicots Rosids Fabales Fabaceae Spatholobus S. suberectus	Scientific Data	748 Mb	2n=18	✔	×	×		China	https://www.nature.com/articles/s41597-019-0110-x?utm_source=xmol&utm_medium=affiliate&utm_content=meta&utm_campaign=DDCN_1_GL01_metadata
182	2021.06	Stevia rebaudiana	Plantae Tracheophytes Angiosperms Eudicots Asterids Asterales Asteraceae Stevia S. rebaudiana	Horticulture Research	1416 Mb	2n=22	✔	×	✔		China	https://www.nature.com/articles/s41438-021-00565-4
183	2019.09	Striga asiatica	Plantae Angiosperms Eudicots Asterids Lamiales Orobanchaceae Striga S. asiatica	Current Biology	472 Mb	2n=24	13,846 scaffolds	✔	×		Japan	https://www.cell.com/current-biology/fulltext/S0960-9822(19)31010-3?_returnURL=https%3A%2F%2Flinkinghub.elsevier.com%2Fretrieve%2Fpii%2FS0960982219310103%3Fshowall%3Dtrue
184	2020.09	Strobilanthes cusia	Plantae Angiosperms Eudicots Asterids Lamiales Acanthaceae Strobilanthes S. cusia	The Plant Journal	865 Mb	2n=32	✔	✔	✔		China	https://onlinelibrary.wiley.com/doi/full/10.1111/tpj.14992
185	2022.04.28	Taxillus chinensis	Plantae Tracheophytes Angiosperms Eudicots Santalales Loranthaceae Taxillus	Genome Biology and Evolution	521.90 Mb	2n=18	✔	×	×		China	https://academic.oup.com/gbe/article/14/5/evac060/6575330
186	2021.07	Taxus chinensis	Plantae Pinophyta Pinopsida Pinales Taxaceae Taxus T. chinensis	Nature Plants	10.23 Gb	2n=24	✔	✔	×		China	https://www.nature.com/articles/s41477-021-00963-5?utm_source=xmol&utm_medium=affiliate&utm_content=meta&utm_campaign=DDCN_1_GL01_metadata
187	2021.07	Taxus wallichiana	Plantae Tracheophytes Gymnosperms Pinophyta Pinopsida Pinales Taxaceae Taxus T. wallichiana	Molecular Plant	10.9 Gb	2n=24	✔	×	✔		China	https://www.sciencedirect.com/science/article/abs/pii/S167420522100160X
188	2019.01	Tectona grandis	Plantae Tracheophytes Angiosperms Eudicots Asterids Lamiales Lamiaceae Tectona T. grandis	Giga science	338 Mb	2n=2x=36	✔	✔	×		USA	https://academic.oup.com/gigascience/article/8/3/giz005/5304368?login=false
189	2017.09	Theobroma cacao	Plantae Angiosperms Eudicots Rosids Malvales Malvaceae Theobroma T. cacao	BMC Genomics	324.7 Mb	2n=20	✔	×	×		France	https://bmcgenomics.biomedcentral.com/articles/10.1186/s12864-017-4120-9
190	2021.07	Thlaspi arvense	Plantae Angiosperms Eudicots Rosids Brassicales Brassicaceae Thlaspi T. arvense	BMC Biology	527.3 Mb	2n=14	✔	✔	×		China	https://bmcbiol.biomedcentral.com/articles/10.1186/s12915-021-01079-0?utm_source=xmol&utm_medium=affiliate&utm_content=meta&utm_campaign=DDCN_1_GL01_metadata
191	2022.07.16	Thymus quinquecostatus	Plantae Angiospermae Magnoliopsida Lamiales Lamiaceae Thymus T.quinquecostatus	Plant Communications	528.66Mb	2n=26	✔	✔	✔		China	https://www.sciencedirect.com/science/article/pii/S2590346222002450
192	2021.01	Toona sinensis	Plantae Angiosperms Eudicots Rosids Sapindales Meliaceae Toona T. sinensis	Molecular Ecology Resources	596 Mb	2n=56	✔	×	×		China	https://onlinelibrary.wiley.com/doi/abs/10.1111/1755-0998.13318
193	2019	Trichopus zeylanicus	Plantae Magnoliopsida Liliidae Pandananae Dioscoreales Dioscoreaceae Trichopus T.zeylanicus	G3: Genes, Genomes, Genetics	713.4 Mb	2n=28	22,601 scaffolds	✔	✔		Kerala	https://academic.oup.com/g3journal/article/9/8/2395/6026814?login=false
194	2020.12	Trichosanthes anguina	Plantae Angiosperms Eudicots Rosids Cucurbitales Cucurbitaceae Trichosanthes T. cucumerina T. c. subsp. Anguina	Horticulture Research	919.8 Mb	2n=22	✔	✔	×		China	https://www.nature.com/articles/s41438-020-00423-9
195	2020.02	Tripterygium wilfordii	Plantae Angiosperms Eudicots Rosids Celastrales Celastraceae Tripterygium T. wilfordii	Nature Communications	348.38 Mb	2n=46	✔	✔	✔		China	https://www.nature.com/articles/s41467-020-14776-1
196	2018	Vernicia fordii	Plantae Angiospermae Magnoliopsida Malpighiales Euphorbiaceae Vernicia V.fordii	Plant & Cell Physiology	1200 Mb	2n=18	20,614 scaffolds	✔	✔		China	https://academic.oup.com/pcp/article/59/10/1990/5077255?login=false
196	2019	Vernicia fordii	Plantae Angiospermae Magnoliopsida Malpighiales Euphorbiaceae Vernicia V.fordii	Genomics, Proteomics & Bioinformatics	1.12 Gb	2n=18	✔	✔	×		China	https://www.sciencedirect.com/science/article/pii/S167202291830216X
197	2015.01	Vigna angularis	Plantae Angiosperms Eudicots Rosids Fabales Fabaceae Faboideae Vigna V. angularis	Scientific Reports	443 Mb	2n=22	3,883 scaffolds	×	×		Korea	https://www.nature.com/articles/srep08069
197	2015.10	Vigna angularis	Plantae Angiosperms Eudicots Rosids Fabales Fabaceae Faboideae Vigna V. angularis	PNAS	450 Mb	2n=22	✔	✔	×		China	https://www.pnas.org/content/112/43/13213
198	2014.11	Vigna radiata	Plantae Angiosperms Eudicots Rosids Fabales Fabaceae Faboideae Vigna Ceratotropis Ceratotropis V. radiata	Nature Communications	431 Mb	2n=2x=22	✔	✔	×		Korea	https://www.nature.com/articles/ncomms6443
198	2021.07	Vigna radiata	Plantae Angiosperms Eudicots Rosids Fabales Fabaceae Faboideae Vigna Ceratotropis Ceratotropis V. radiata	The Plant Genome	475 Mb	2n=2x=22	✔	×	×		Korea	https://acsess.onlinelibrary.wiley.com/doi/10.1002/tpg2.20121
199	2019.04	Vigna unguiculata	Plantae Tracheophyta Angiosperms Eudicots Rosids Fabales Fabaceae Faboideae Vigna V. unguiculata	The Plant Journal	519 Mb	2n=22	✔	×	×		USA	https://onlinelibrary.wiley.com/doi/10.1111/tpj.14349
200	2019.06	Xanthoceras sorbifolium	Plantae Angiosperms Eudicots Rosids Sapindales Sapindaceae Xanthoceroideae Xanthoceras Bunge X. sorbifolium	Giga science	504.2 Mb	2n=30	✔	×	×		China	https://academic.oup.com/gigascience/article/8/6/giz070/5523202
200	2019.06	Xanthoceras sorbifolium	Plantae Angiosperms Eudicots Rosids Sapindales Sapindaceae Xanthoceroideae Xanthoceras Bunge X. sorbifolium	Giga science	439.97 Mb	2n=30	✔	×	×		China	https://academic.oup.com/gigascience/article/8/6/giz071/5523203
201	2021.08	Zingiber officinale	Plantae Angiosperms Monocots Commelinids Zingiberales Zingiberaceae Zingiber Z. officinale	Horticulture Research	3.05 Gb for all	2n=22	✔	✔	×		China	https://www.nature.com/articles/s41438-021-00599-8
201	2021.08	Zingiber officinale	Plantae Angiosperms Monocots Commelinids Zingiberales Zingiberaceae Zingiber Z. officinale	Horticulture Research	haplotype 1: 1.53 Gb haplotype 0: 1.51 Gb	2n=22	✔	✔	✔		China	https://www.nature.com/articles/s41438-021-00627-7
202	2022.01.11	Zizania latifolia	Plantae Tracheophytes Angiosperms Monocots Commelinids Poales Poaceae Zizania Z. latifolia	Communications Biology	547.38 Mb	2n=34	✔	✔	×		China	https://www.nature.com/articles/s42003-021-02993-3?utm_source=xmol&utm_medium=affiliate&utm_content=meta&utm_campaign=DDCN_1_GL01_metadata
203	2014.10	Ziziphus jujuba	Plantae Tracheophyta Angiosperms Eudicots Rosids Rosales Rhamnaceae Ziziphus Z. jujuba	Nature Communications	321.45 Mb	2n=24	✔	✔	×		China	https://www.nature.com/articles/ncomms6315
203	2021.11	Ziziphus jujuba	Plantae Tracheophyta Angiosperms Eudicots Rosids Rosales Rhamnaceae Ziziphus Z. jujuba	Frontiers in Plant Science	406 Mb	2n=24	540 scaffolds	✔	×		China	https://www.frontiersin.org/articles/10.3389/fpls.2021.773090/full
